# Supplementary material
Source: PubMed Central journal article supplement (PMC6360142)
Supplement: NIHMS1502883-supplement-10985_2018_9438_MOESM1_ESM.pdf [file NIHMS1502883-supplement-10985_2018_9438_MOESM1_ESM.pdf]

# Supplementary Material

**Contour plots of true CCSHR values for various degrees of dependence  
between size frailty  $A$  and shape frailty  $B$ .**

Six pairs of plots follow - original scale and logarithm scale per degree of dependence (correlation).

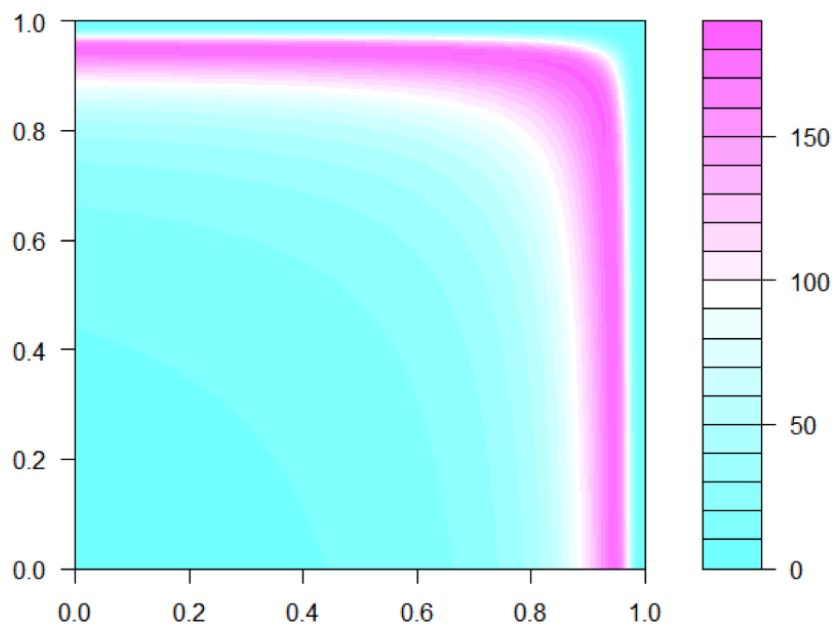

Figure 1: Contour plot of true CCSHR values,  $\text{Corr}=1$ , original scale

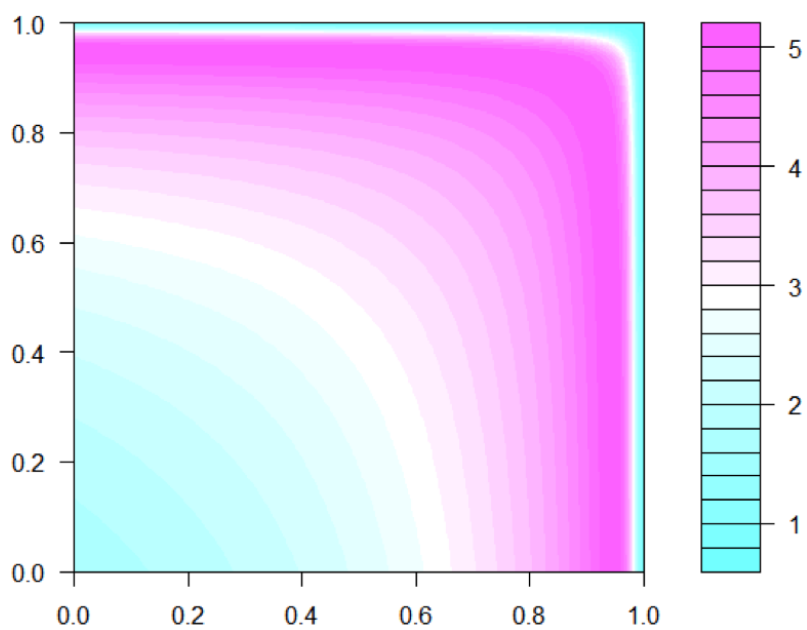

Figure 2: Contour plot of true CCSHR values,  $\text{Corr}=1$ , log scale

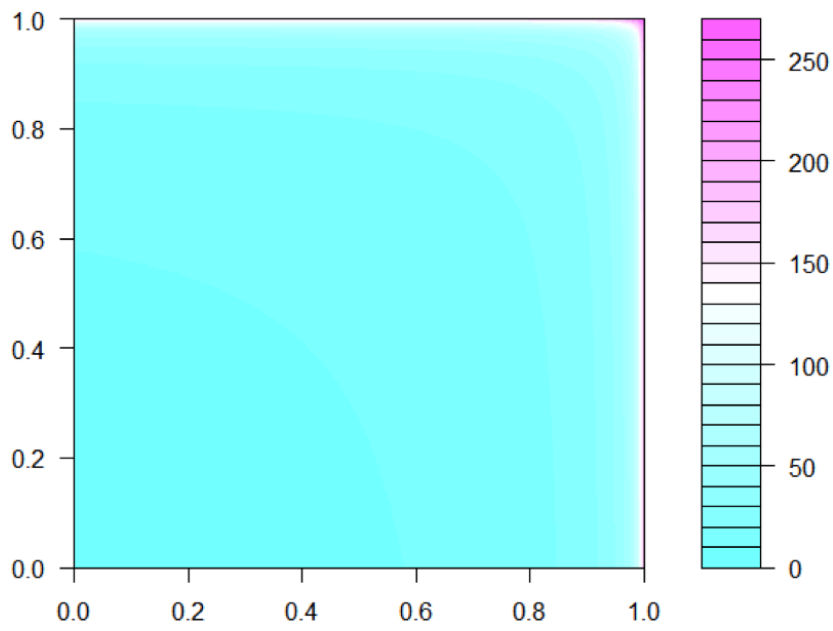

Figure 3: Contour plot of true CCSHR values,  $\text{Corr}=0.7$ , original scale

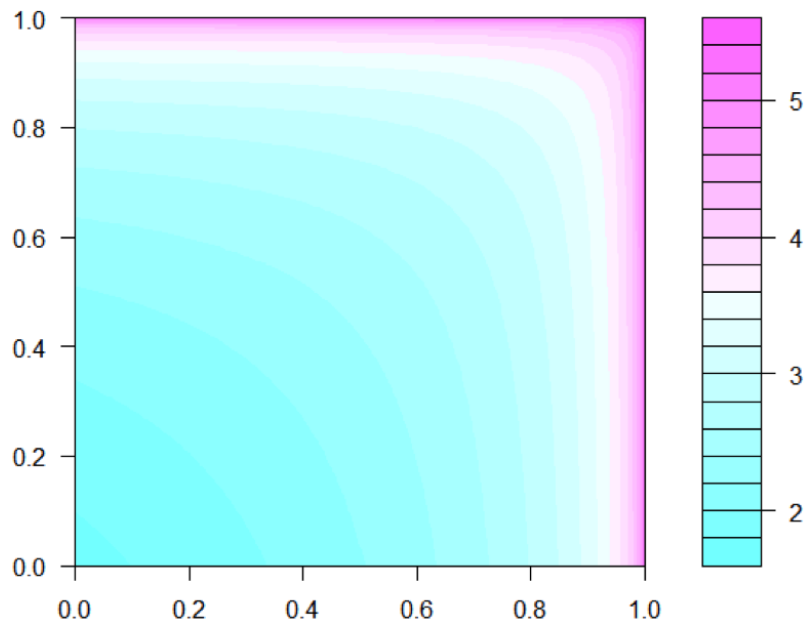

Figure 4: Contour plot of true CCSHR values,  $\text{Corr}=0.7$ , log scale

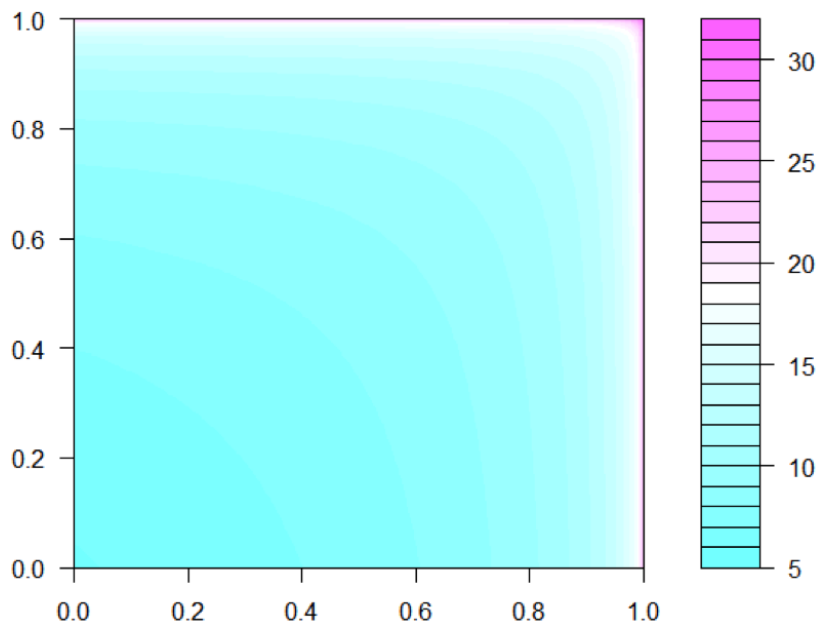

Figure 5: Contour plot of true CCSHR values,  $\text{Corr}=0.4$ , original scale

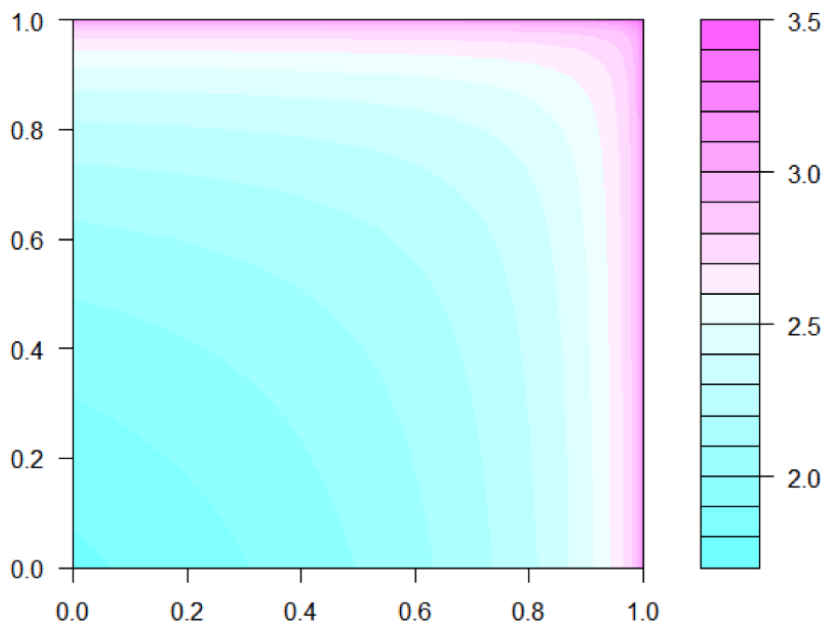

Figure 6: Contour plot of true CCSHR values,  $\text{Corr}=0.4$ , log scale

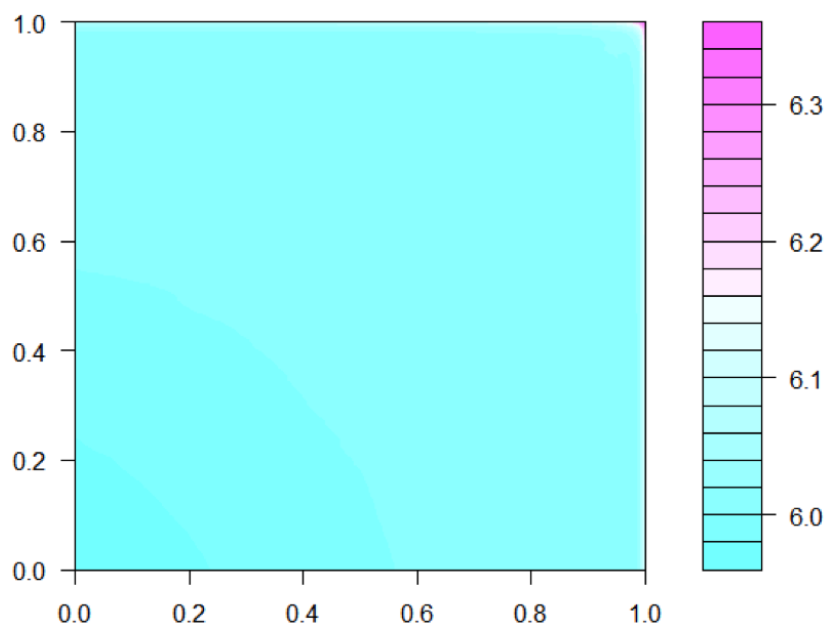

Figure 7: Contour plot of true CCSHR values,  $\text{Corr}=0$ , original scale

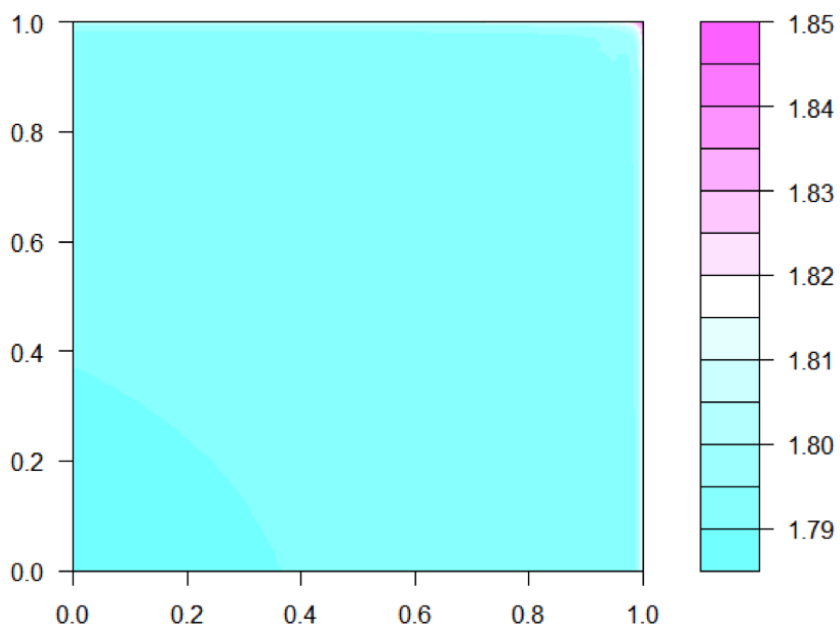

Figure 8: Contour plot of true CCSHR values,  $\text{Corr}=0$ , log scale

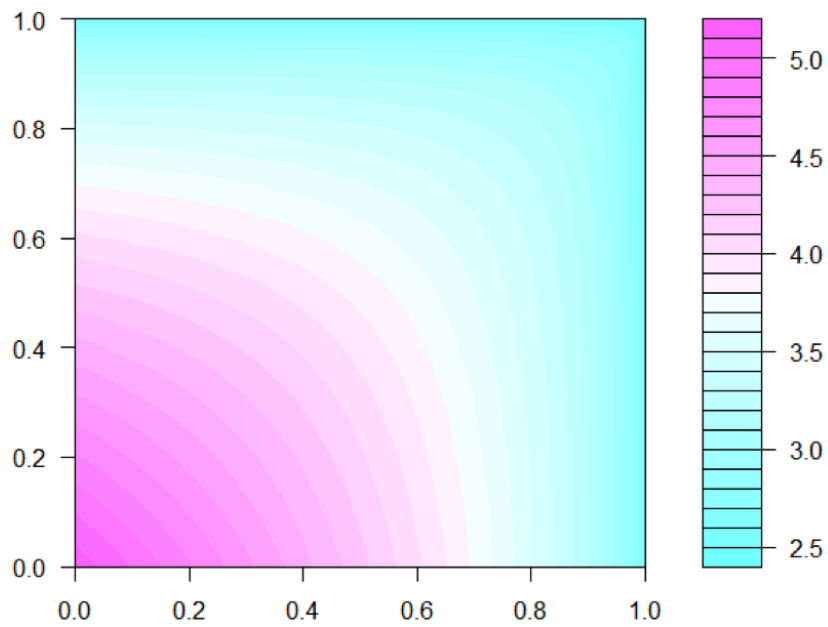

Figure 9: Contour plot of true CCSHR values,  $\text{Corr}=-0.5$ , original scale

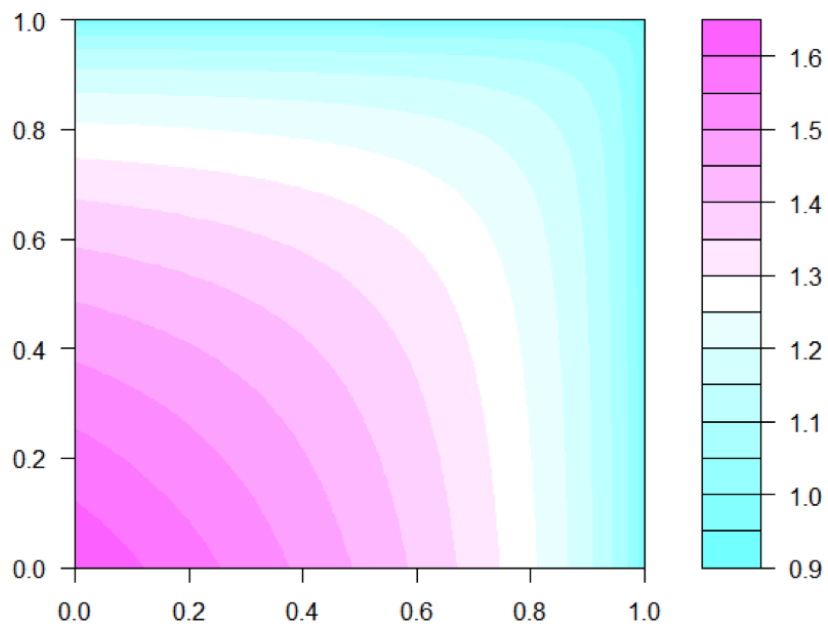

Figure 10: Contour plot of true CCSHR values,  $\text{Corr}=-0.5$ , log scale

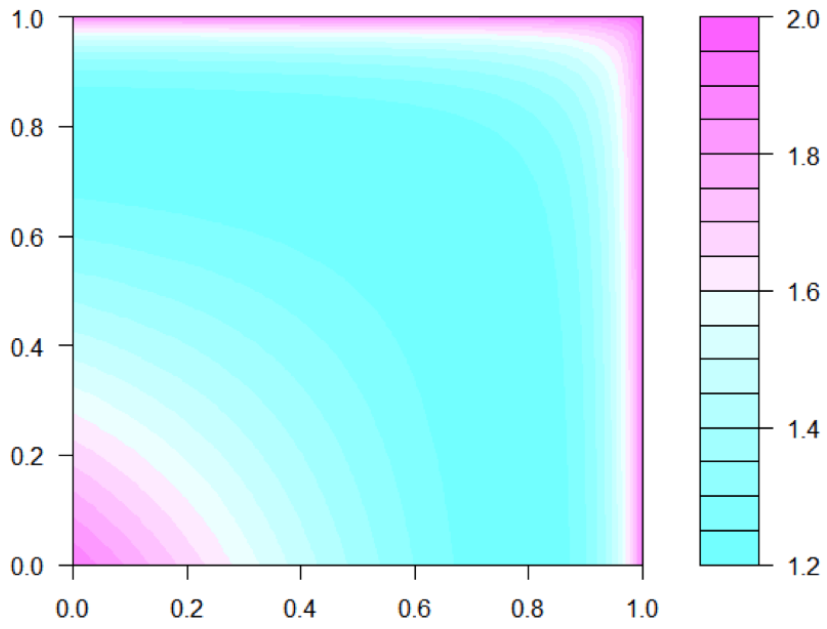

Figure 11: Contour plot of true CCSHR values,  $\text{Corr}=-1$ , original scale

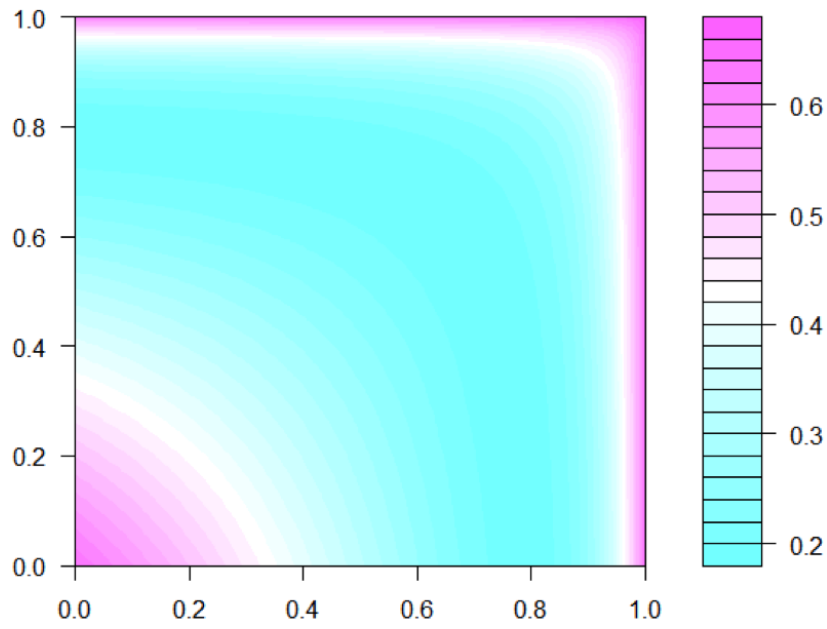

Figure 12: Contour plot of true CCSHR values,  $\text{Corr}=-1$ , log scale
